# Supplementary material for: Microwave Heating of the Catalyst Bed as a Way of Energy-Saving Oxidative Dehydrogenation of Ethane on a Mo-V-Te-Nb-Ox Catalyst
Source: MDPI journal article supplement (doi:10.3390/nano12244459), 2022-12-15
Supplement: s1 [file s1]

## Supplementary Materials

### Microwave heating of the catalyst bed as a way of energy-saving oxidative dehydrogenation of ethane on a Mo-V-Te-Nb-Ox catalyst

Alexei Kucherov<sup>1</sup>, Nikolai Davshan<sup>1</sup>, Elena Finashina<sup>1</sup>, Leonid Kustov<sup>1,2,3</sup>

1 Zelinsky Institute of Organic Chemistry, Russian Academy of Sciences, 119991, Moscow, Russian Federation. Fax: +7 499 137 2935; E-mail: akuchero2004@yahoo.com

2 Chemistry Department, Moscow State University, 1 Leninskie Gory, bldg. 3, Moscow, 119992 Russia.

3 National University of Science and Technology MISiS, Leninsky prosp. 4, Moscow, Russia

Correspondence: [lmkustov@mail.ru](mailto:lmkustov@mail.ru)

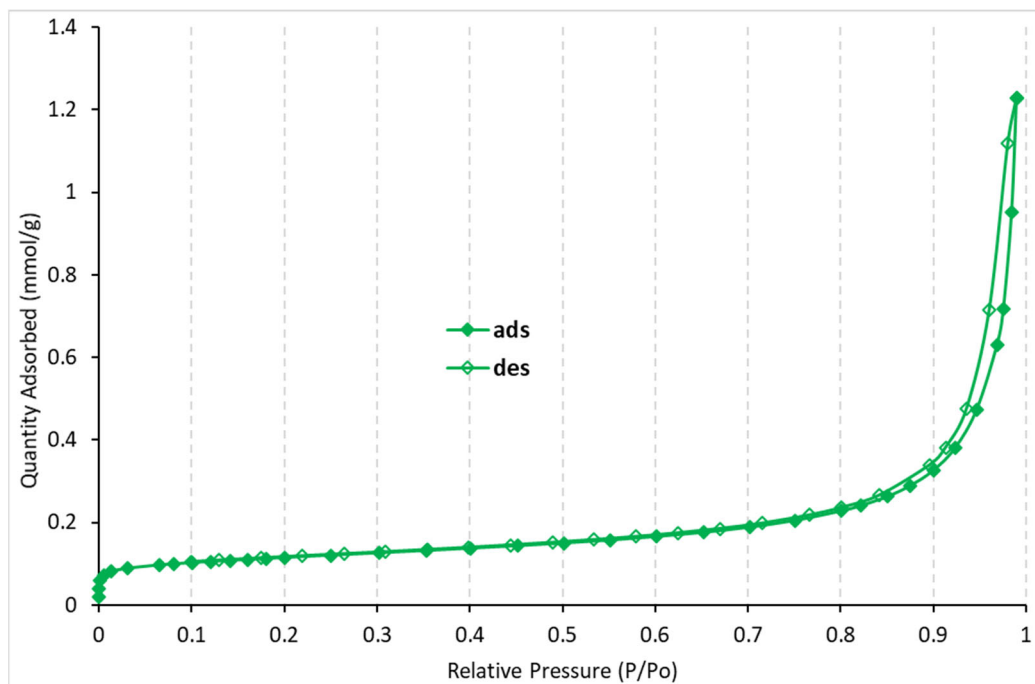

Figure S1. N<sub>2</sub> adsorption isotherms.

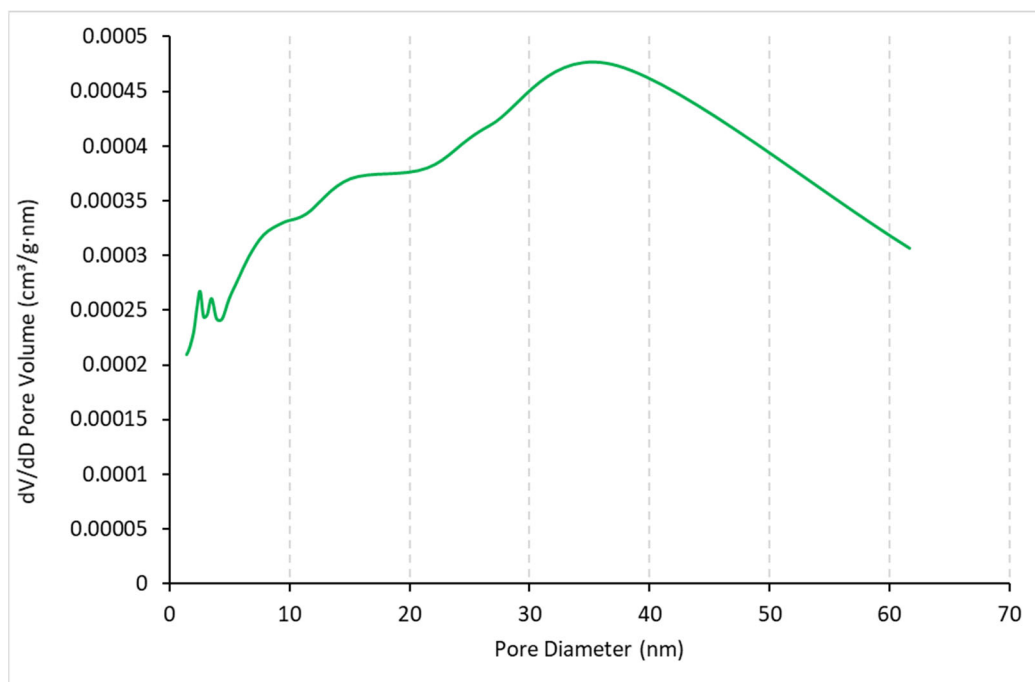

Figure S2. Mesopore size distribution for the Mo-V-Te-Nb-O catalyst (calculation by the BJH method, desorption branch of the isotherm).

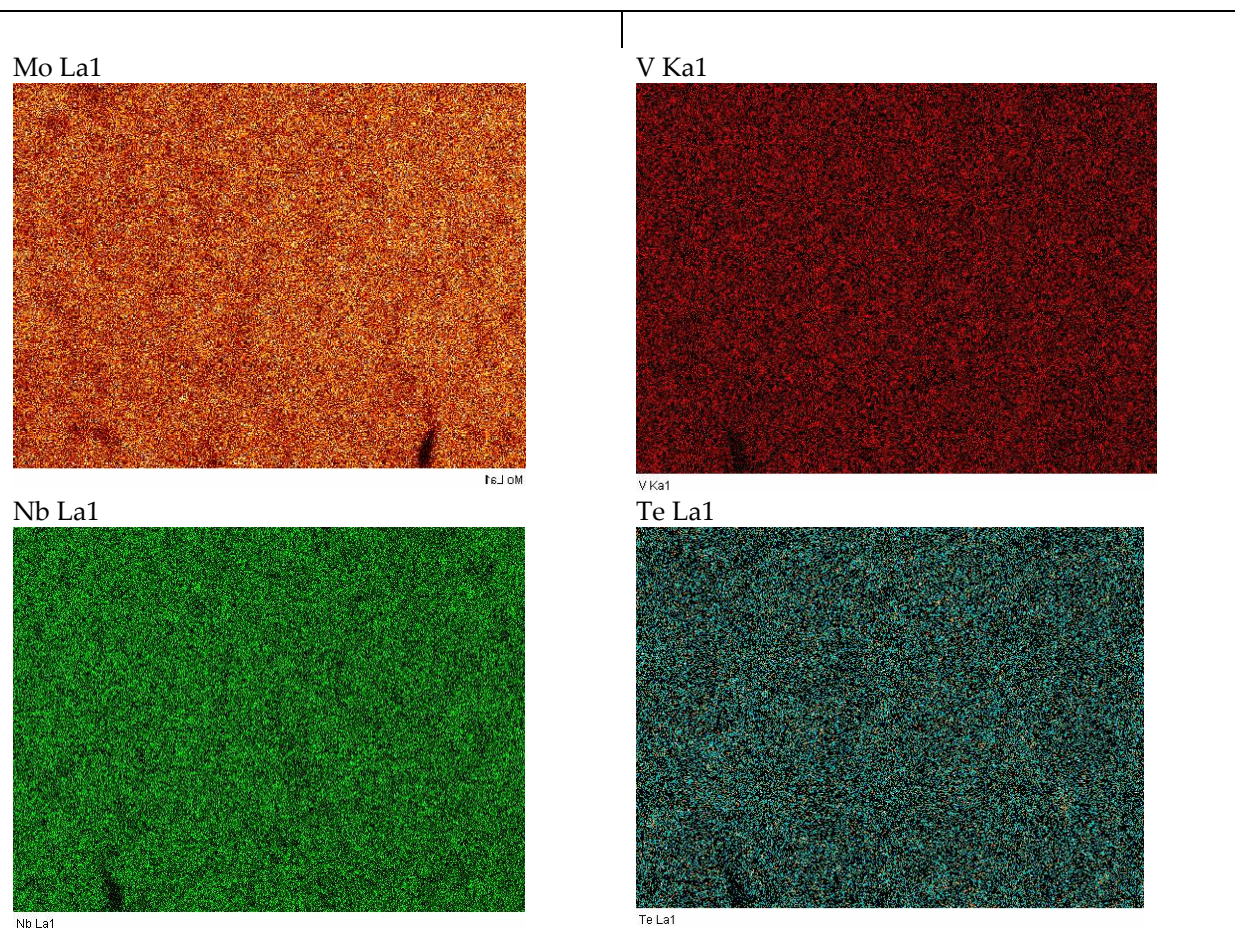

Figure S3. Elements distribution over the crystal phase in the Mo-V-Te-Nb-O catalyst (by EDX).

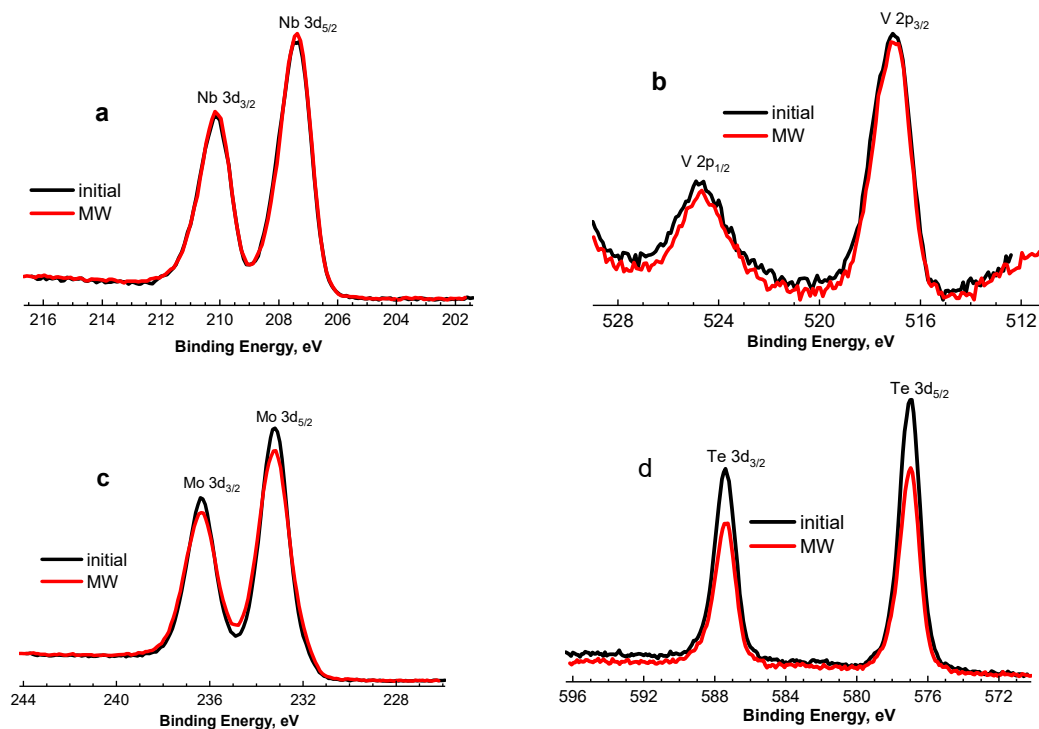

Figure S4. XPS of the MoVTenbO catalyst: Nb 3d (a), V 2p (b), Mo 3d (c) and Te 3d (d).
